# Supplementary material for: Development and validation of a prediction model for fat mass in children and adolescents: meta-analysis using individual participant data
Source: PubMed Central journal article supplement — BMJ. 2019 Jul 24;366:l4293. doi: 10.1136/bmj.l4293 (PMC6650932; doi:10.1136/bmj.l4293), 2019-07-24
Supplement: hudm049262.ww1.pdf [file hudm049262.ww1.pdf]

**SUPPLEMENTARY TABLES & FIGURES:**

**SUPPLEMENTARY TABLE 1: INFORMATION ON THE DERIVATION AND EXTERNAL VALIDATION STUDIES**

| <b>Study [ref]</b>                                                  | <b>Date of Study</b> | <b>Location</b> | <b>Setting</b>                                                                        | <b>Age Group</b> | <b>Response Rate</b> | <b>Ethnicity Reporting</b>          |
|---------------------------------------------------------------------|----------------------|-----------------|---------------------------------------------------------------------------------------|------------------|----------------------|-------------------------------------|
| <b>Derivation Datasets:</b>                                         |                      |                 |                                                                                       |                  |                      |                                     |
| 1) The assessment of Body Composition in Children (ABCC) Study [17] | 2011-2012            | London          | Primary schools                                                                       | 8-10 years       | 64%                  | Reported by parent                  |
| 2) The East London Bioelectrical Impedance (ELBI) [23]              | 2008-2009            | London          | Secondary schools, weight management clinic and volunteers recruited by advertisement | 11-15 years      | Not Applicable       | Self-reported                       |
| 3) The Reference Child (RC) [24]                                    | 2001-2010            | London          | Volunteers recruited by advertisement                                                 | 4-22 years       | Not Applicable       | Self-reported or reported by parent |
| 4) The Size and Lung function in Children (SLIC) Study [25]         | 2012-2013            | London          | Primary Schools                                                                       | 5-11 years       | 52%                  | Reported by parent                  |
|                                                                     |                      |                 |                                                                                       |                  |                      |                                     |
| <b>Validation Dataset:</b>                                          |                      |                 |                                                                                       |                  |                      |                                     |
| Avon Longitudinal Study of Parents and Children (ALSPAC) [26, 27]   | 2002-2003            | Bristol         | Population based advertising                                                          | 11-12 years      | Not Applicable       | Reported by parent                  |

SUPPLEMENTARY TABLE 2: ASSESSMENT OF CALIBRATION SLOPE AND CALIBRATION-IN-THE-LARGE IN TERMS OF FAT MASS AND FAT FREE MASS FROM INTERNAL-EXTERNAL CROSS-VALIDATION

| Study omitted for external validation | Fat Free Mass            |                     | Fat Mass                 |                     |
|---------------------------------------|--------------------------|---------------------|--------------------------|---------------------|
|                                       | Calibration-In-The-Large | Calibration Slope   | Calibration-In-The-Large | Calibration Slope   |
| 1                                     | 0.05 (-0.45 to 0.55)     | 0.97 (0.95 to 0.99) | 0.35 (0.16 to 0.54)      | 1.03 (1.01 to 1.05) |
| 2                                     | 1.62 (0.34 to 2.90)      | 0.98 (0.95 to 1.01) | -0.73 (-1.37 to -0.10)   | 0.99 (0.95 to 1.03) |
| 3                                     | 1.02 (0.36 to 1.67)      | 0.98 (0.96 to 1.01) | -0.74 (-1.15 to -0.33)   | 1.02 (0.98 to 1.05) |
| 4                                     | -0.37 (-0.97 to 0.22)    | 1.05 (1.02 to 1.07) | -0.20 (-0.48 to 0.09)    | 0.95 (0.93 to 0.97) |
| Pooled                                | 0.46 (-0.30 to 1.21)     | 1.00 (0.96 to 1.03) | -0.29 (-0.83 to 0.25)    | 1.00 (0.95 to 1.04) |

SUPPLEMENTARY FIGURE 1: HISTOGRAM OF FAT FREE MASS (TOP) AND LN(FAT FREE MASS), BY SEX

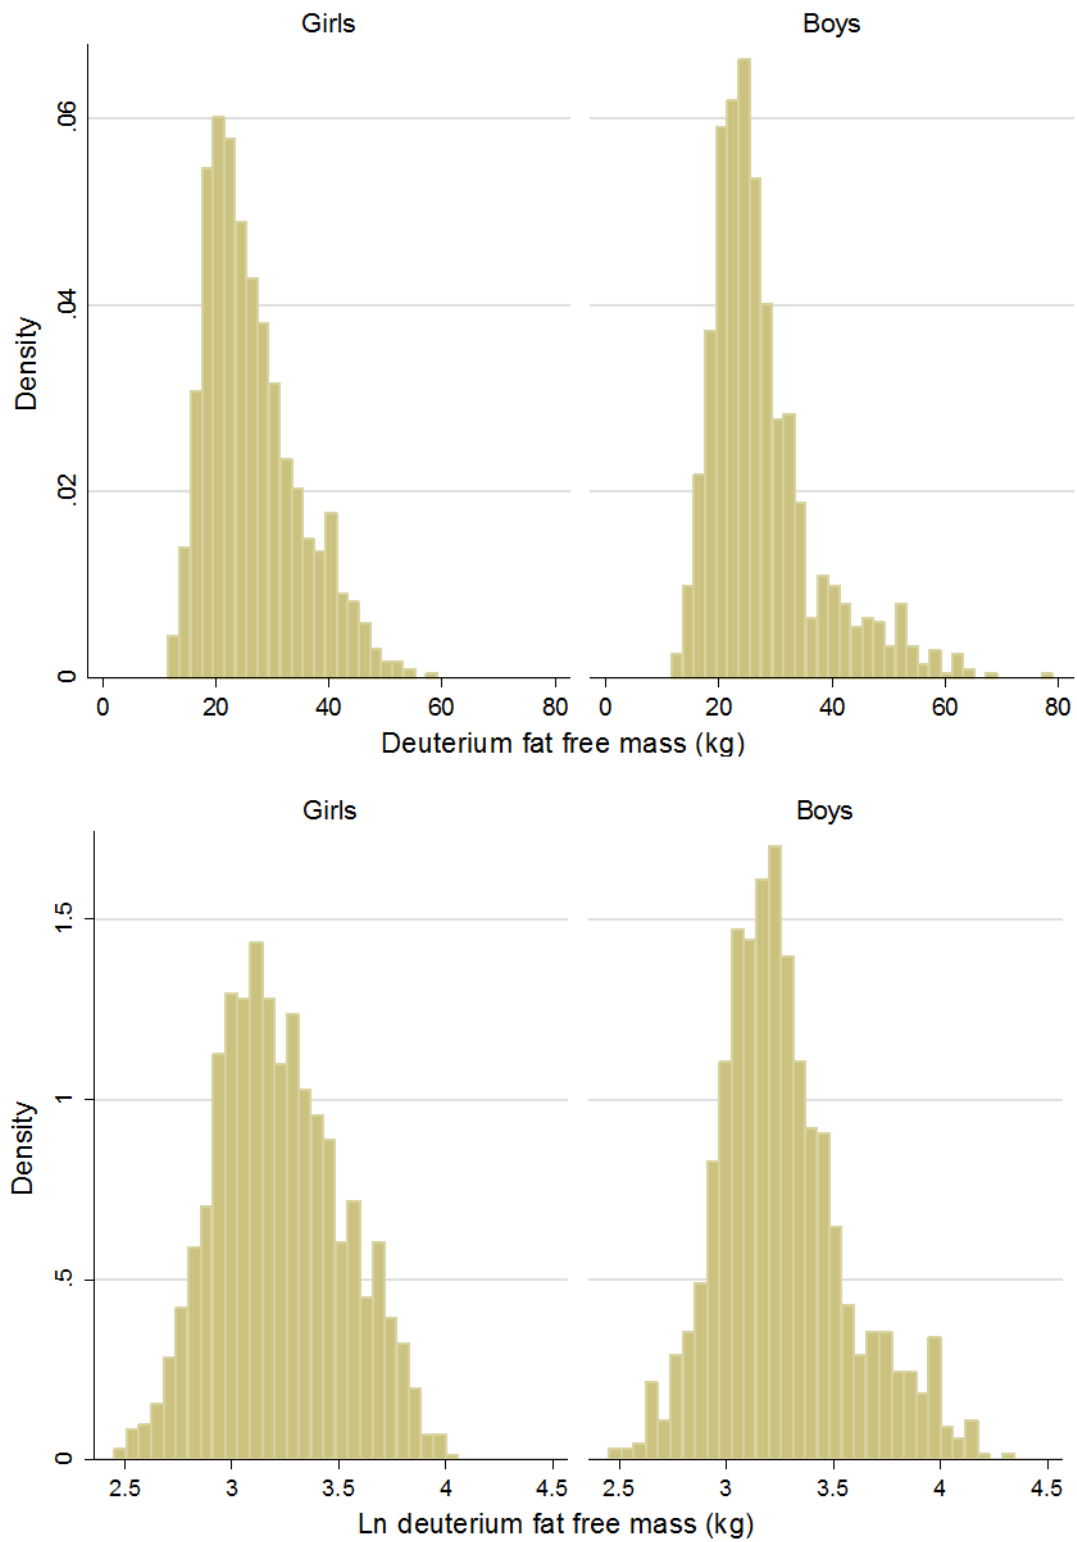

FOOTNOTE: LN = Natural logarithmic transformation

SUPPLEMENTARY FIGURE 2: CALIBRATION SLOPES AND CALIBRATION-IN-THE-LARGE (KG), BY SEX, FROM INTERNAL-EXTERNAL CROSS VALIDATION

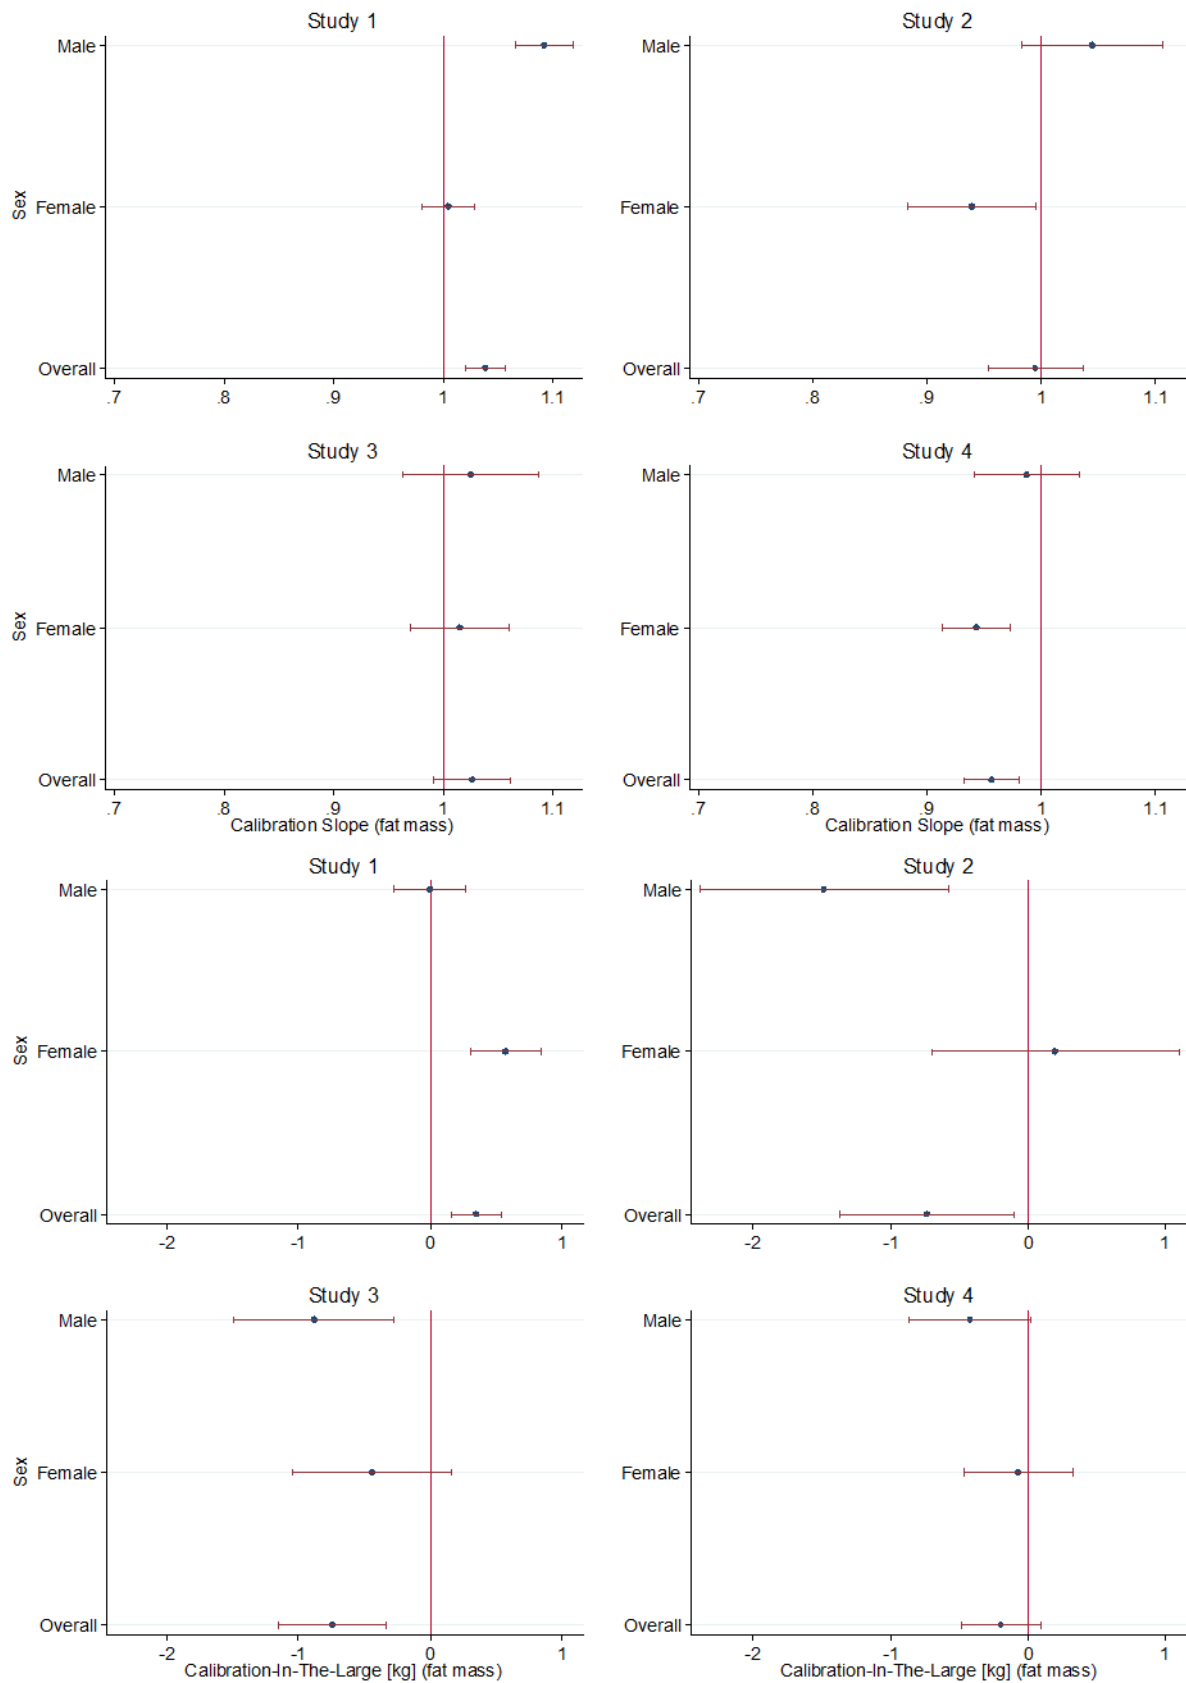

FOOTNOTE: Study codes: 1 = The assessment of Body Composition in Children Study, 2 = The East London Bioelectrical Impedance, 3 = The Reference Child, 4 = The Size and Lung function in Children Study.

SUPPLEMENTARY FIGURE 3: CALIBRATION SLOPES AND CALIBRATION-IN-THE-LARGE (KG), BY ETHNIC GROUP, FROM INTERNAL-EXTERNAL CROSS VALIDATION

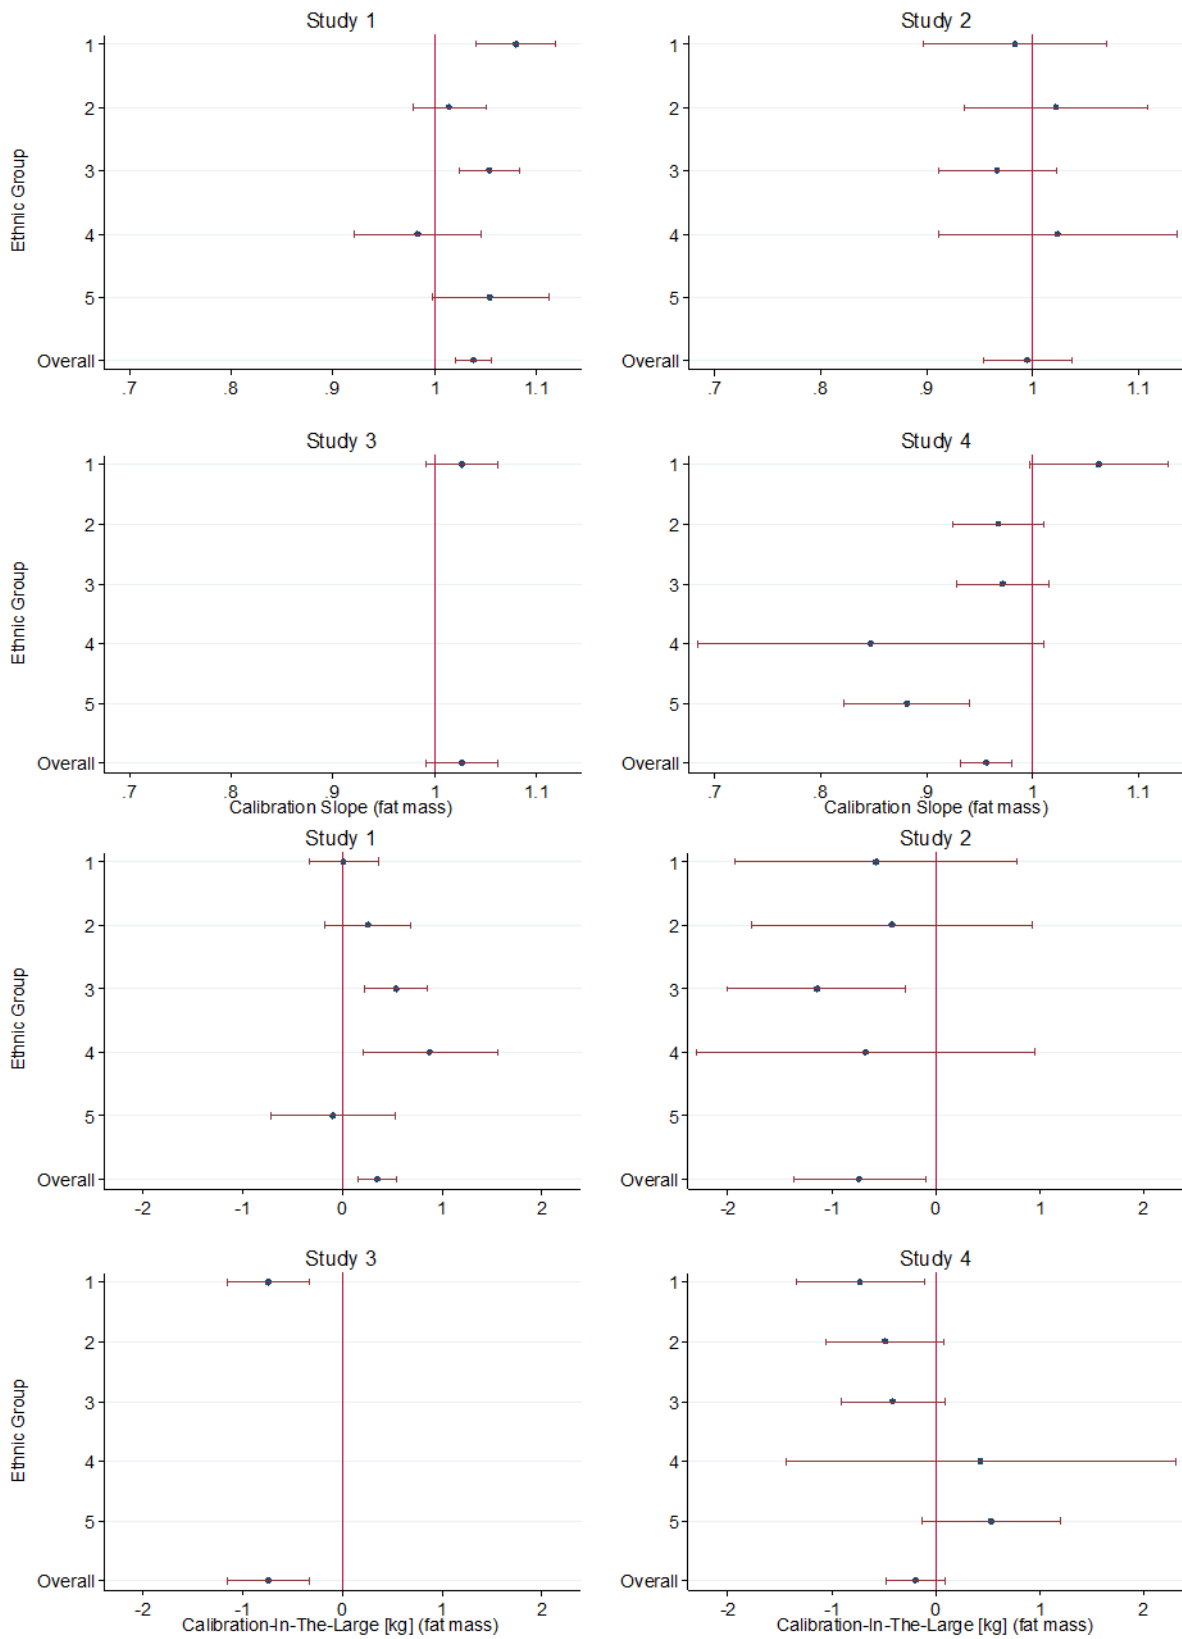

FOOTNOTE: Study codes: 1 = The assessment of Body Composition in Children Study, 2 = The East London Bioelectrical Impedance, 3 = The Reference Child, 4 = The Size and Lung function in Children Study. Ethnic group labels: 1 = White, 2 = Black, 3 = South Asian, 4 = Other Asian, 5 = Other.

## APPENDIX 1: COMPARISON OF ESTIMATING FM DIRECTLY OR INDIRECTLY

The two approaches for estimating FM can be written as follows:

Equation 1:  $FM_{\text{direct}} = f(\text{height, weight, age, sex, ethnic group}) + \varepsilon$ ; such that  $\varepsilon \sim N(0, \sigma^2)$

Equation 2:  $FM_{\text{indirect}} = \text{weight} - \text{FFM} = \text{weight} - [g(\text{height, weight, age, sex, ethnic group}) + \mu]$ ; such that  $\mu \sim N(0, \tau^2)$ .

Therefore, possible estimates of FM are  $\hat{f}$  or  $\text{weight} - \hat{g}$ . It was clear from scatter plots of both FM and FFM, obtained from the DD method, plotted against height (Figure 1 below), that the variance in FFM with height was more homogeneous than for FM (i.e.  $\tau^2 < \sigma^2$ ). Hence, a regression model for FFM (equation 2) should be estimated with greater precision than a model for FM (equation 1) because of the more homogenous relationship with height. As the variance of weight is  $\approx 0$  due to negligible measurement error, equation 2 ( $\text{weight} - \hat{g}$ ) would be expected to provide more precise estimates of FM compared to estimates from  $\hat{f}$ , making the indirect approach likely to be the preferred method for estimating FM.

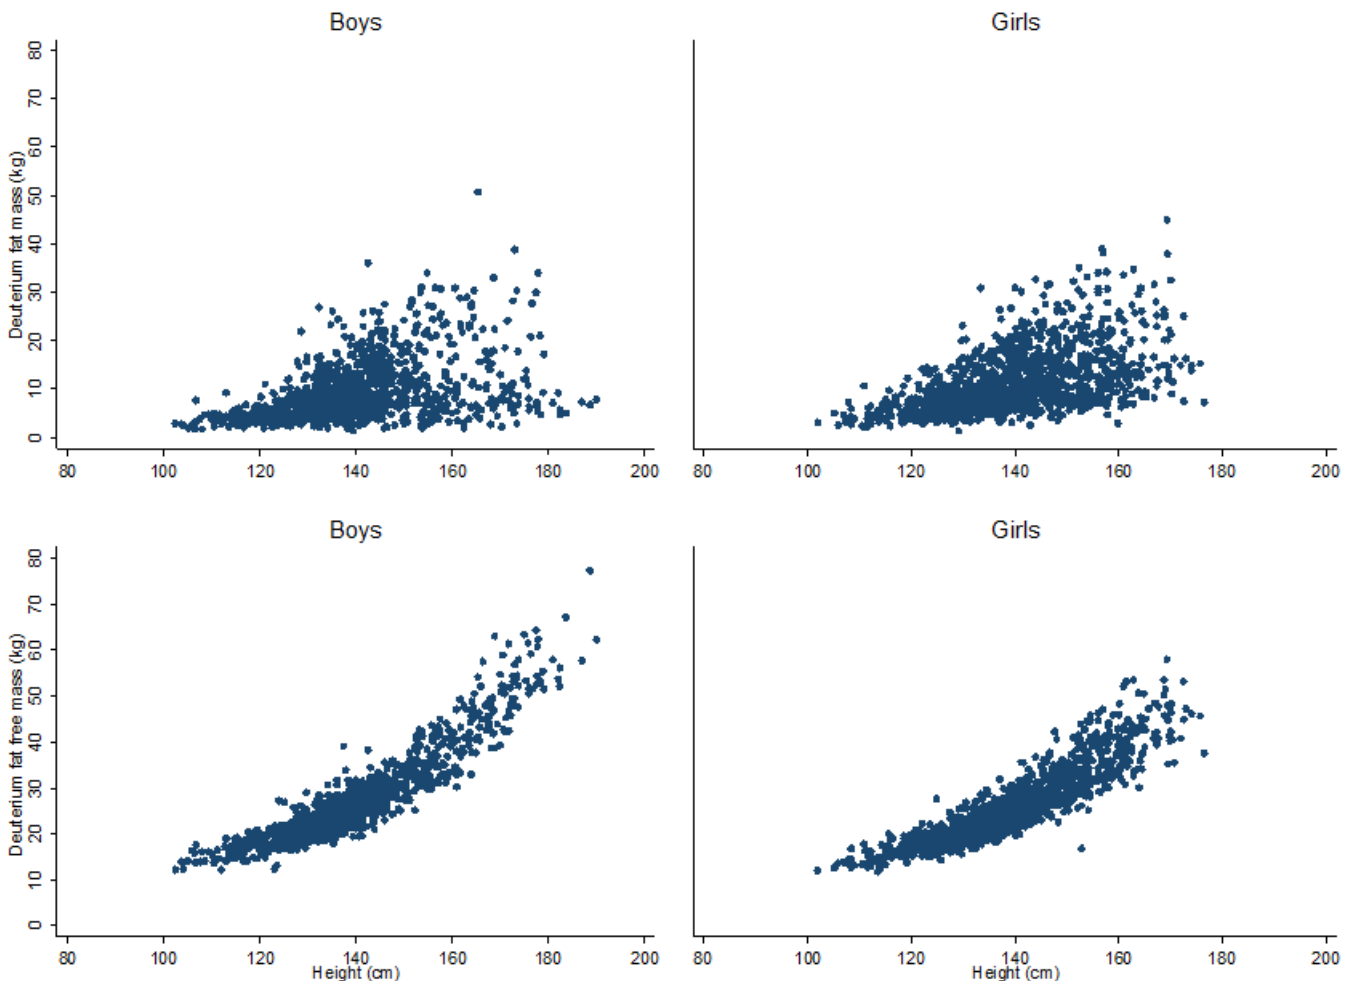

Figure 1: Scatterplot of FM (top) and FFM (bottom) against height in boys (left) and girls (right)

## APPENDIX 2: INTERNAL VALIDATION VIA BOOTSTRAPPING

The following steps were undertaken for the bootstrapping process<sup>33</sup>:

1. 1000 bootstrap samples were randomly selected from the entire DD derivation datasets, with replacement, such that the size of each bootstrap sample (N= 2375) was equal to that of the entire DD derivation dataset (N=2375). This selection process was stratified by sex, ethnic group and age to ensure that each bootstrap sample contained a representative sample of each of the subgroups.
2. The final developed prediction model was fitted within each bootstrap sample to obtain estimates of model performance based on  $R^2$ , the calibration slope and calibration-in-the-large (CIL).
3. Calculation of optimism-adjustments for  $R^2$ , the calibration slope and CIL:
  - a. Values of  $R^2$ , the calibration slope and CIL were obtained, for each 1000 bootstrap sample
  - b. The values from a. were subtracted from the original  $R^2$ , the calibration slope and CIL values from the original DD derivation datasets to obtain the level of optimism in each performance measure within each of the 1000 bootstrap samples
  - c. The average of the differences in measures from b. across the 1000 bootstrap samples were determined
  - d. Optimism-adjusted values of  $R^2$  (denoted as  $R^2_{\text{adjusted}}$ ), the calibration slope (denoted as Calibration Slope<sub>adjusted</sub>) and CIL (denoted as CIL<sub>adjusted</sub>) were obtained by subtracting the average of the differences (i.e. the value from c.) from the original  $R^2$  and calibration slopes from the original DD derivation datasets
